# Supplementary material for: Preparation of Highly Crystalline Silk Nanofibrils and Their Use in the Improvement of the Mechanical Properties of Silk Films
Source: MDPI journal article supplement (doi:10.3390/ijms231911344), 2022-09-26
Supplement: s1 [file s1]

## Supporting Information

### Preparation of Highly Crystalline Silk Nanofibrils and their Use in the Improvement of the Mechanical Properties of Silk Films

Ji Hye Lee<sup>1</sup>, Bo Kyung Park<sup>2</sup> and In Chul Um<sup>1\*</sup>

1 Department of Biofibers and Biomaterials Science, Kyungpook National University, Daegu 41566, Republic of Korea

2 Buildings and Transportation Science Division, Oak Ridge National Laboratory, One Bethel Valley Road, Oak Ridge, TN 37831, USA

\* Correspondence: [icum@knu.ac.kr](mailto:icum@knu.ac.kr)

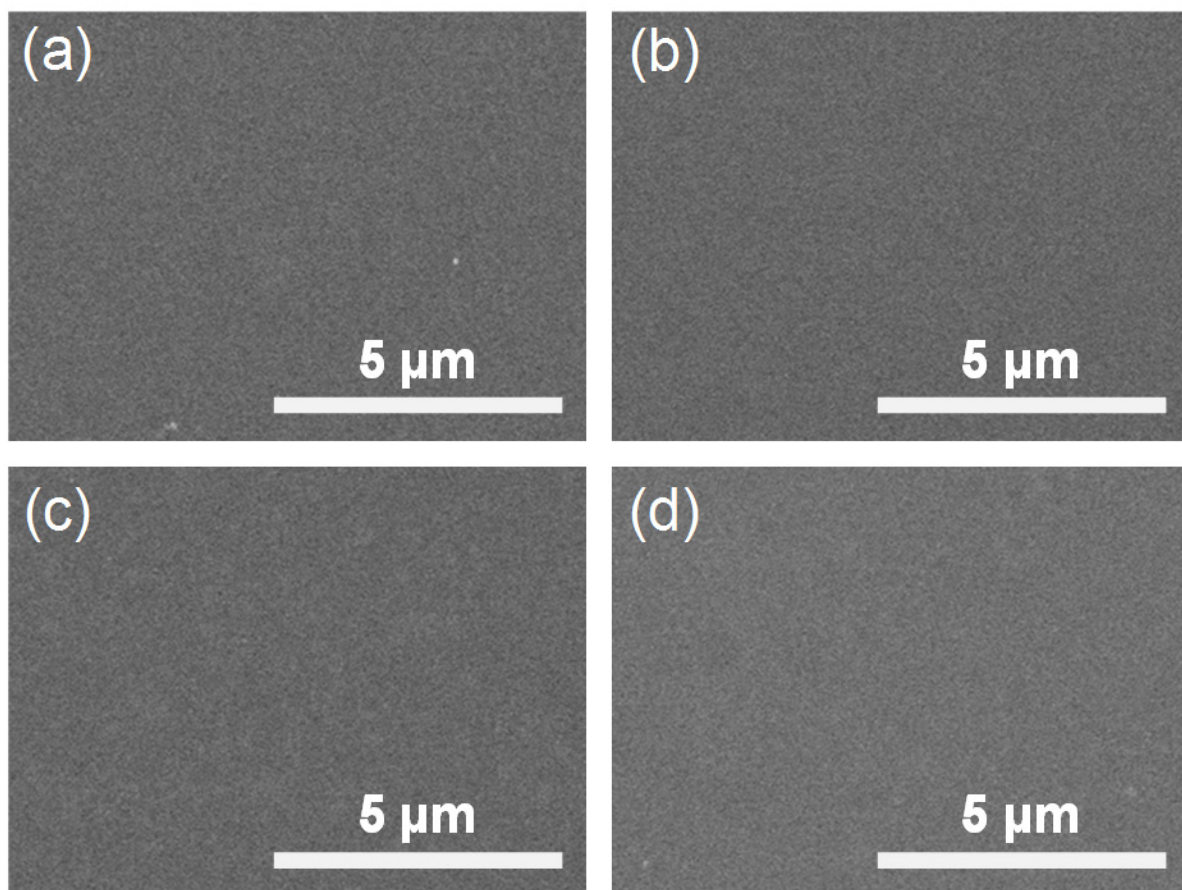

**Figure S1.** FE-SEM images of the surface of silk nanofibril/RSF composite films containing different amounts of silk nanofibrils; (a) 0%, (b) 5%, (c) 10%, and (d) 15%.
